# Supplementary material for: Genome-Wide Identification of TCP Family Transcription Factors in Medicago truncatula Reveals Significant Roles of miR319-Targeted TCPs in Nodule Development
Source: PubMed Central journal article supplement (PMC6004737; doi:10.3389/fpls.2018.00774), 2018-06-11
Supplement: Image_1.pdf [file Image_1.pdf]

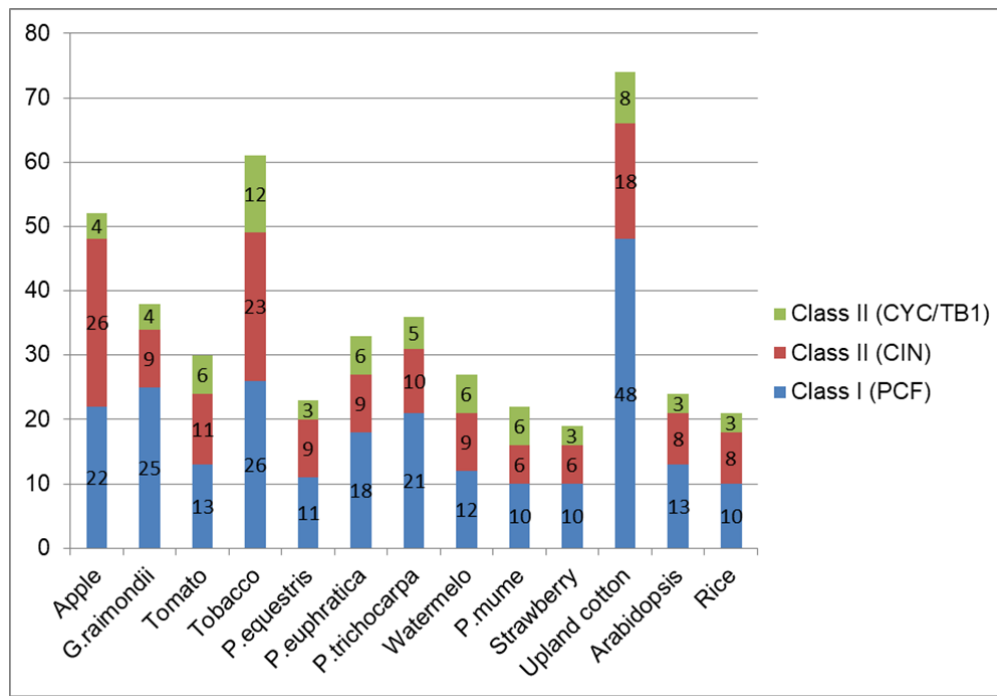

**Supplementary Figure 1. Some known TCP family members of different species.**

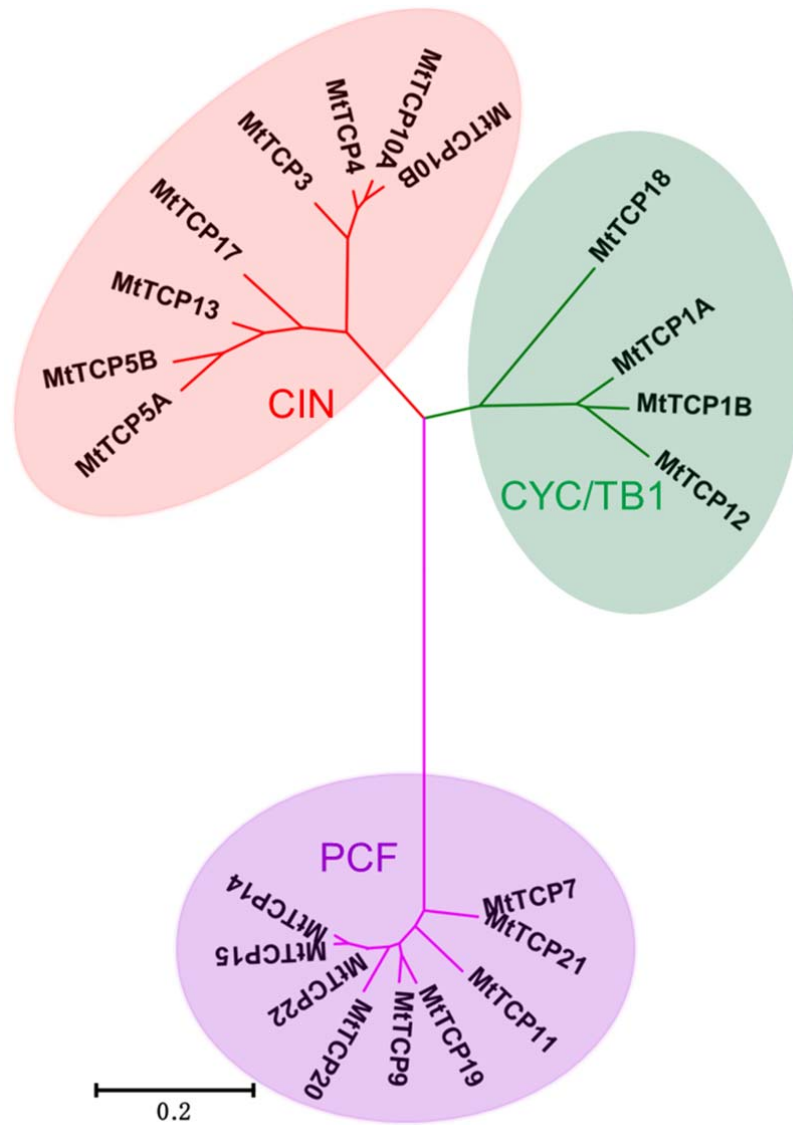

**Supplementary Figure 2. Phylogenetic analysis of MtTCP proteins using the TCP domains.** Phylogenetic analysis using only the TCP domain amino acid sequences. Multiple sequences were aligned using Clustal W and the phylogenetic trees were constructed using MEGA7.1 by the Neighbor-Joining method with bootstrap replication of 1,000 times.

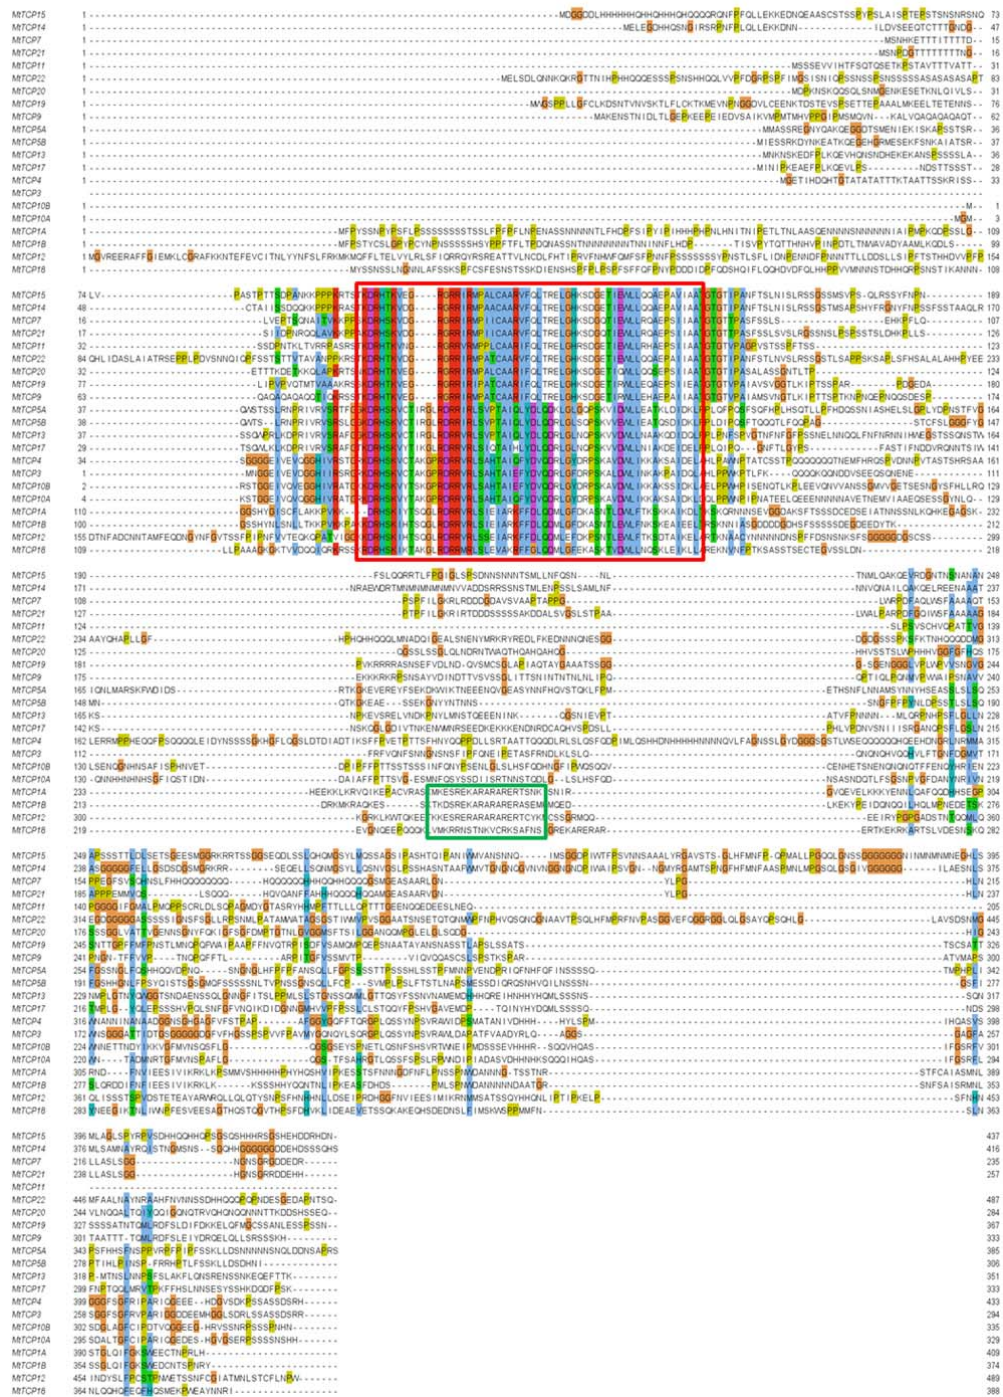

**Supplementary Figure 3. Multiple amino acid sequence alignment of MtTCP proteins.** Multiple sequence alignment of MtTCP proteins using full-length amino acid sequences. Sequences were aligned using Jalview. Red box shows the conserved TCP domain. Green box shows the R domain.



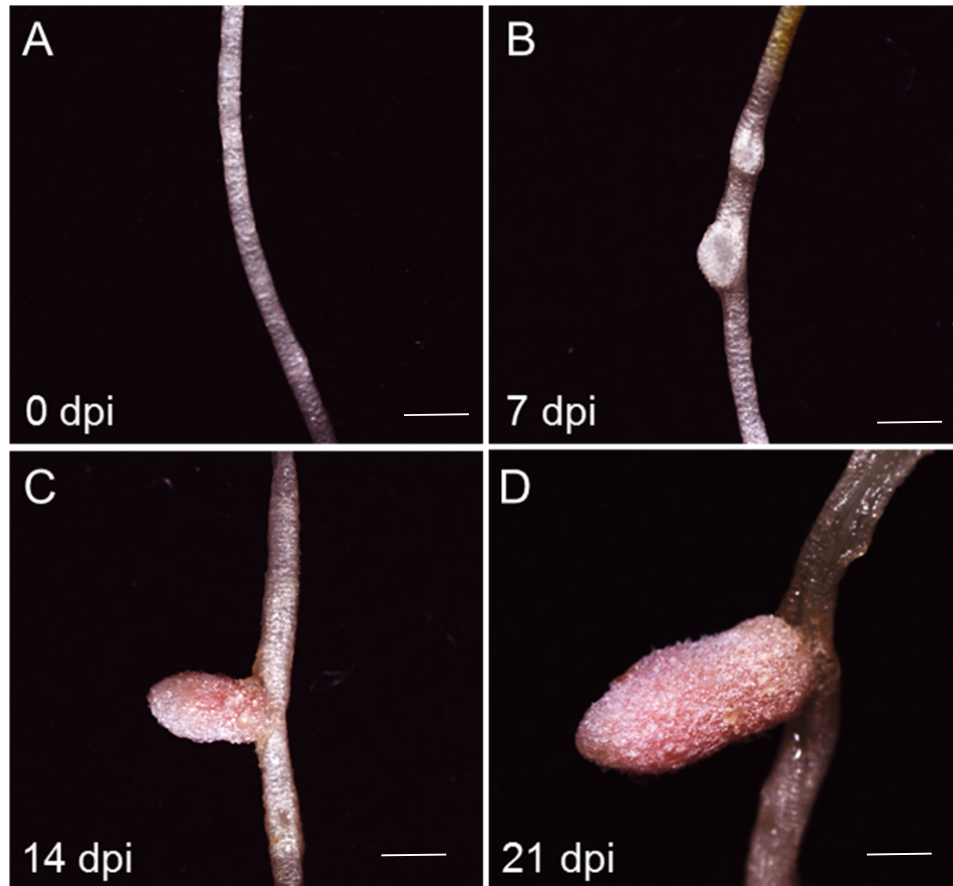

**Supplementary Figure 5. Nodules at different developmental stages in wild type.**  
(A-D) The size and shape of nodules at 0, 7, 14, and 21 days post inoculation (dpi) inoculated with *S. meliloti* 1021 strain. Bar = 2 mm.

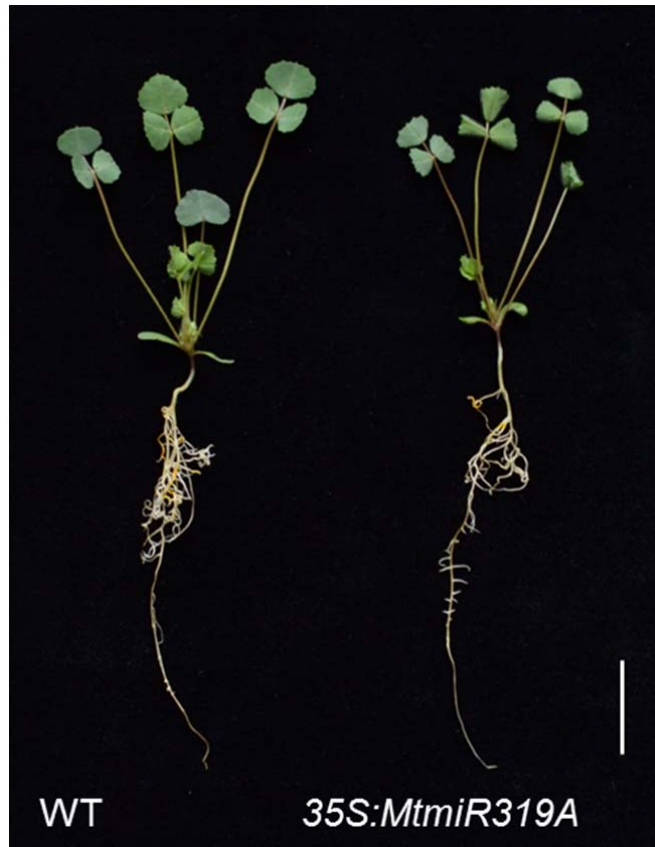

**Supplementary Figure 6. Three weeks old plants of wild type and *35S:MtmiR319A* without inoculated with *S. meliloti* 1021 strain. Bar = 1cm.**

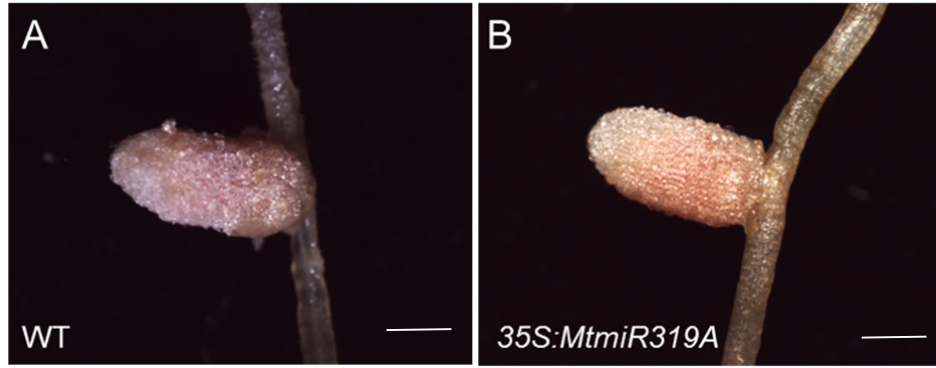

**Supplementary Figure 7. Nodules of wild type and *35S:MtmiR319A* plants after three weeks inoculated with *S. meliloti* 1021 strain. Bar = 2 mm.**

**Supplementary Table 1** Primers used in this study.

|                |                                 |
|----------------|---------------------------------|
| MtTCP1A-qRT-F  | TTTTGTGCTATAGCCAGCATGAA         |
| MtTCP1A-qRT-R  | TCCTCCCATGATTTTCCAAAGA          |
| MtTCP1B-qRT-F  | ATAACAATGATGCTGCCACT            |
| MtTCP1B-qRT-R  | AAGATTTGAAGCCCTGATG             |
| MtTCP3-qRT-F   | TTGTTGCGGCTGATTATCGA            |
| MtTCP3-qRT-R   | AAAGCCACCAGAAGCAAATCC           |
| MtTCP4-qRT-F   | CAGCGGAGGAGGAGGAGAAA            |
| MtTCP4-qRT-R   | CCTGTTGAACGGACAATGTGAC          |
| MtTCP5A-qRT-F  | GCAAAGCAAGAAGGAGGTGATAC         |
| MtTCP5A-qRT-R  | TGATGTTGACCATTGTCTTGATGTA       |
| MtTCP5B-qRT-F  | AACAAACCCTATTTTCAGCAACCA        |
| MtTCP5B-qRT-R  | TTCATACCATAAAAACCACCTCCAA       |
| MtTCP7-qRT-F   | CACAGTAAAGTAGACGGACGAGGAA       |
| MtTCP7-qRT-R   | ACGTGCGGCGCAAATTAT              |
| MtTCP9-qRT-F   | TGTGCAGCTCGGATCTTTCA            |
| MtTCP9-qRT-R   | GTTTCGCCATCGGACTTATGTC          |
| MtTCP10A-qRT-F | TGGTTAATTCGCCTGCGTTT            |
| MtTCP10A-qRT-R | CCCCTATGGGCGGAAAAA              |
| MtTCP10B-qRT-F | CATAGTTCGAGCCACCGGTAA           |
| MtTCP10B-qRT-R | TCGCGAGGACCTTTTGATGT            |
| MtTCP11-qRT-F  | AAACCTTCCACCGCCGTAAC            |
| MtTCP11-qRT-R  | TGGTGTTGGGATCGGAAGAG            |
| MtTCP12-qRT-F  | TGATTACTCCTTATTCCCTTGTTCAA      |
| MtTCP12-qRT-R  | TGGCTATTCCACAAAAGTTGGA          |
| MtTCP13-qRT-F  | GCTTCATCACAATGGCCAAGAT          |
| MtTCP13-qRT-R  | CCTTTCCACCAAAGCTCTTGA           |
| MtTCP14-qRT-F  | CCTGTGCTGCCAGAGTGTTT            |
| MtTCP14-qRT-R  | CGTCTCGCCGTCTGATTTATG           |
| MtTCP15-qRT-F  | CCGCCGCATCCGAAT                 |
| MtTCP15-qRT-R  | GCCAAGTTCGCGTGTAAGCT            |
| MtTCP17-qRT-F  | CAACCTTCTTTTTTGGGATCGTT         |
| MtTCP17-qRT-R  | AGACGACGGCTCCAATTGAT            |
| MtTCP18-qRT-F  | GCAAGATCAAACCGCGAAA             |
| MtTCP18-qRT-R  | AAACCTCTTTGCAACTTCAAGTGA        |
| MtTCP19-qRT-F  | CACCATGTTTCCTTCAATAGACACCAATGGC |
| MtTCP19-qRT-R  | GTAGCAGAGATAATCGTATAGAG         |
| MtTCP20-qRT-F  | CACCATGGATACCGGCCCTTGGA         |
| MtTCP20-qRT-R  | GACCGCCGCCGTCTAGTT              |
| MtTCP21-qRT-F  | CACCATGAATACCGGACCTTGGAGAGATG   |
| MtTCP21-qRT-R  | CTTCCGGTCGAACTGGACCGA           |



---

|                |                                 |
|----------------|---------------------------------|
| MtTCP22-qRT-F  | CACCATGGACGGCGGAGACAACG         |
| MtTCP22-qRT-R  | ATCTTGTGGATCTTCCTCACCGC         |
| MtTCP3-CDS-F   | CACCATGAACGGTGGAGAGATAGTGAAG    |
| MtTCP3-CDS-R   | ACGGCGAGAATCTGAGGACG            |
| MtTCP4-CDS-F   | CACCATGGGAGAAACAATACACGACCAGCAC |
| MtTCP4-CDS-R   | ATGGCGAGAGTCGGAGGAAGCAGAG       |
| MtTCP10A-CDS-F | CACCATGAGGAGTACTGGAGGAGAGATAG   |
| MtTCP10A-CDS-R | GTTGTGATTAGGAGAAGAAGAA          |
| MtTCP10B-CDS-F | CACCATGGGAATGAAGAGCACAGGAGG     |
| MtTCP10B-CDS-R | GTGATGAGAATTAGAAGAAGAGG         |
| MtmiR319A-F    | CACCATTTAGGGTTAGGGTTCTTTGTTTG   |
| MtmiR319A-R    | TTGGTCTAACCTCGCTACATCAC         |
| MtUBI-qRT-F    | CTGACAGCCCACTGAATTGTGA          |
| MtUBI-qRT-R    | TTTTGGCATTGCTGCAAGC             |

---
